# Supplementary material
Source: PubMed Central journal article supplement (PMC2582254)
Supplement: 0806569105_0806569105SI.pdf [file 0806569105_0806569105SI.pdf]

# Supporting Information

Muir *et al.* 10.1073/pnas.0806569105

## SI Methods

**AS.BIAS Fortran Program to Correct for Ascertainment Bias.** Input to the AS.BIAS Fortran program to correct for ascertainment bias using the formula of Nielson and Clark is an ASCII file called "input.txt," each line of which contains NA, the allele frequency, and NRT, which is the number of loci with this allele frequency. The output file contains the corrected allele frequency distribution.

```
program Main
  INTEGER N,D
  DOUBLE PRECISION, ALLOCATABLE :: PASK(:)
  DOUBLE PRECISION, ALLOCATABLE :: P(:)
  DOUBLE PRECISION, ALLOCATABLE :: NR(:)
  DOUBLE PRECISION C1,C2,C3,SUMPR
  OPEN(UNIT = 10,FILE = 'INPUT.txt') !CATEGORIES
  AND FREQUENCES
  OPEN(UNIT = 11,FILE = 'OUTPUT.txt') !CORRECTED
  DISTRIBUTION
  WRITE(*,*) 'TOTAL NUMBER OF INDIVIDUALS N'
  READ (*,*) NS !NUMBER OF INDIVIDUALS GENO-
  TYPED
  n = 2*NS !N number of total alleles = 2N
  ALLOCATE(PASK(N))
  ALLOCATE(P(N))
  ALLOCATE(NR(N))
  pask = 0.0
  P = 0.0
  !D INDIVIDUALS SEQUENCED, the depth.
  NF = 0
  NR = 0.0
  1 READ(10,*,END = 22) NA,NRT
  NF = NF + 1
  NR(NA) = NRT
  GO TO 1
  22 CONTINUE
  !NA IS THE ALLELE FREQUENCY
  !NRT IS THE NUMBER OF ALLELES WITH THIS FRE-
  QUENCY
  !NR(NA) = NUMBER OF ALLELES WITH FREQ NA
  DO D = 2,2
  SUMPR = 0.00
  CALL RLCOB(N,d,C3)
  DO K = 1,(N-1)/2
  IF(K .GT. D) THEN
  CALL RLCOB(K,d,C1)
  CALL RLCOB(N-K,d,C2)
  PASK(K) = 1.0-DEXP(C1-C3)-DEXP(C2-C3)
  ELSE
  CALL RLCOB(N-K,d,C2)
  PASK(K) = 1.0-DEXP(C2-C3)
  END IF
  if(pask(k) .gt. 0) then
  SUMPR = SUMPR+NR(K)/PASK(K)
  end if
  END DO
  DO K = 1,(N-1)/2
  if(pask(k) .gt. 0) then
  P(K) = (NR(K)/PASK(K))/SUMPR
  ELSE
  P(K) = 0.0
  END IF
  if(p(k) .gt. 0) then
```

```
WRITE(*,*) N,D,K,P(K)
WRITE(11,*) N,D,K,P(K)
end if
END DO
END DO
STOP
END
Following computes LOG(n!/(d!)(n-d!))
SUBROUTINE RLCOB(n,d,X)
  INTEGER N,D
  DOUBLE PRECISION X,Y,Z,W
  IF(N .GE. D) THEN
  CALL Rlfact(N,Y)
  CALL Rlfact(D,Z)
  CALL Rlfact(N-D,W)
  X = Y-Z-W
  ! X = DEXP(X)
  ELSE
  X = 0.00
  END IF
  RETURN
END
Following COMPUTES THE LOG OF A FACTORIAL
SUBROUTINE Rlfact(n,Y)
  DOUBLE PRECISION Y
  IF(N .EQ. 0) THEN
  Y = DLOG(1.00)
  ELSE IF (N .GT. 0) THEN
  Y = 0.00
  DO I = 1,N
  Y = Y+DLOG(DFLOAT(I))
  END DO
  ELSE
  Y = -1.00
  STOP
  END IF
  RETURN
END
```

**Clustering Based on PCA.** Let  $g_{ij}$  be the genotype for SNP  $i$  of individual  $j$ , where  $i = 1-M$  and  $j = 1-N$ . The  $g_{ij}$  were centered and normalized by subtracting the average allele frequency at that locus ( $p_i$ ) and dividing by  $\sqrt{p_i(1-p_i)}$ . An  $N \times N$  covariance matrix,  $\psi$ , was constructed among individuals based on the centered normalized genotypes, where  $\psi_{jj'}$  is the covariance between individuals  $j$  and  $j'$ . Price *et al.* (13) defined the  $k$ th axis of variation as the  $k$ th largest eigenvalue of  $\psi$ . They also defined the ancestry,  $a_{jk}$ , of individual  $j$  along the  $k$ th axis of variation as the  $j$ th element of the  $k$ th eigenvector. They used the ancestry values as covariates to adjust phenotype and candidate gene data for admixture. In our application, we used the eigenvalues and ancestry coefficients to construct an index of shared ancestry among the strains to quantify strata among the samples. The ancestry coefficients were weighted by their associated eigenvalues  $\lambda_k$ , for all  $\lambda_k > 0$  and by 0 otherwise. Because there is always some shared ancestry between lineages, this index of ancestry provides a continuous scale for classification, which was divided into 10 bins or strata.

PCA analysis along the first two axis of variation are shown in [supporting information \(SI\) Fig. S4](#). These results suggest that the RJF and Chinese Silkie are the most divergent of all samples

with all other breeds at the opposite extreme to these two. But seven axes of variation existed with eigenvalues 1. When all seven of these axes were combined into an index of weighted ancestry, the breeds within the center were clearly differentiable. These are shown in [Fig. S5A](#), with bins constituting strata shown in [Fig. S5B](#). It is interesting that all white egg layers, regardless of source, are considered to be from the same strata; similarly, all

broiler populations constitute another strata. Thus, despite company differences in breeding goals, their populations are not really that different when considering the more global reference.

Results also are shown in [Fig. S7](#). When inbreeding was calculated based on UPGMA clustering rather than on PCA, the UPGMA estimates were about 3% less than the PCA-derived values.

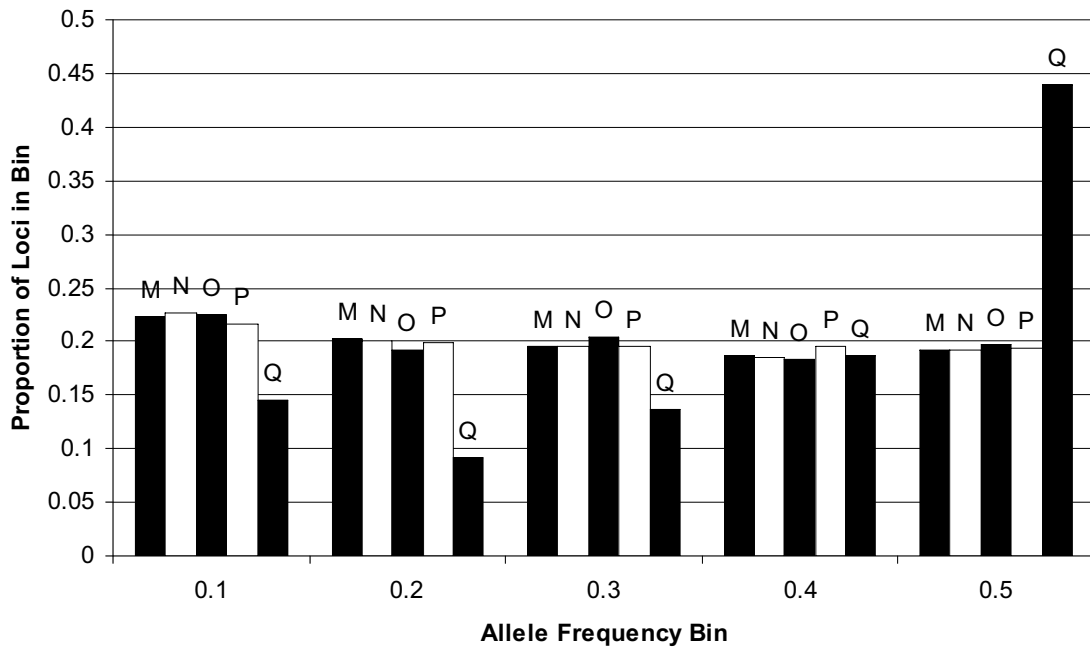

Fig. S1. Frequency distribution resulting from clustering at alternative distances.

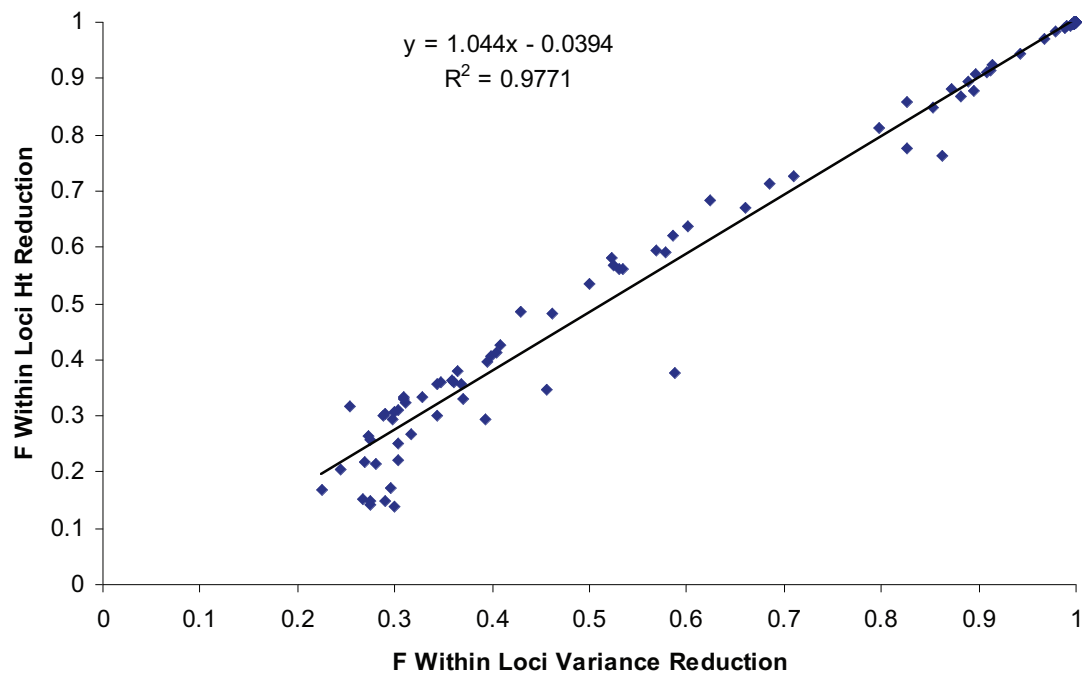

Fig. S2. Regression of  $F_{IT}$  estimated within loci as heterozygosity reduction on  $F_{IT}$  estimated within loci as variance reduction.

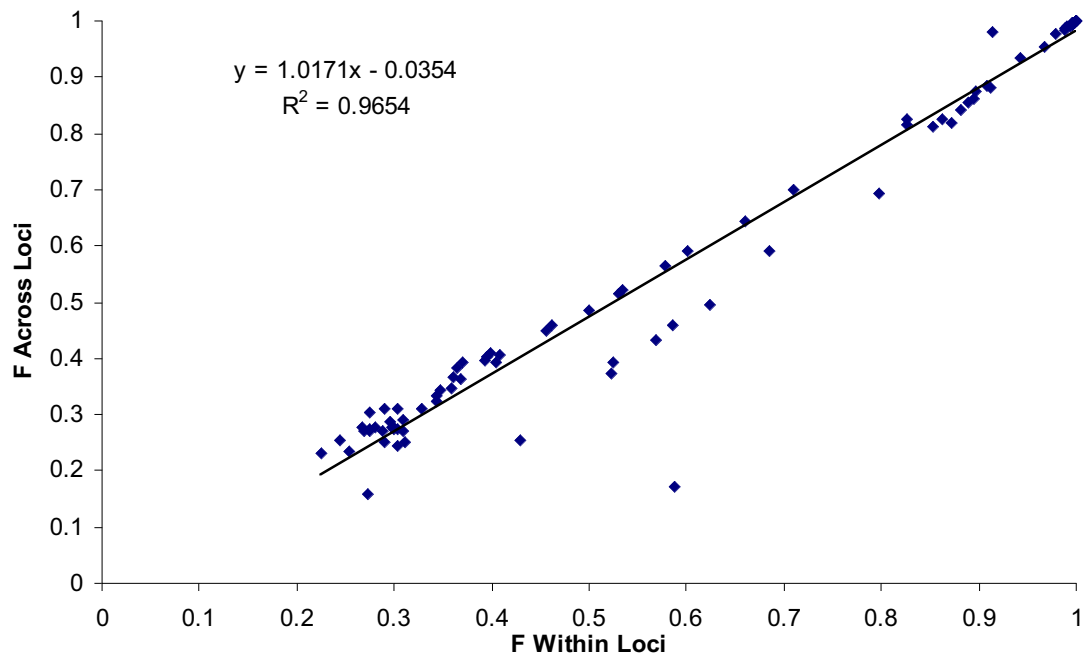

Fig. S3. Regression of  $F_{IT}$  estimated across loci as heterozygosity reduction on  $F_{IT}$  estimated within loci as variance reduction.

### Ancestry Coefficients along the axis of variation

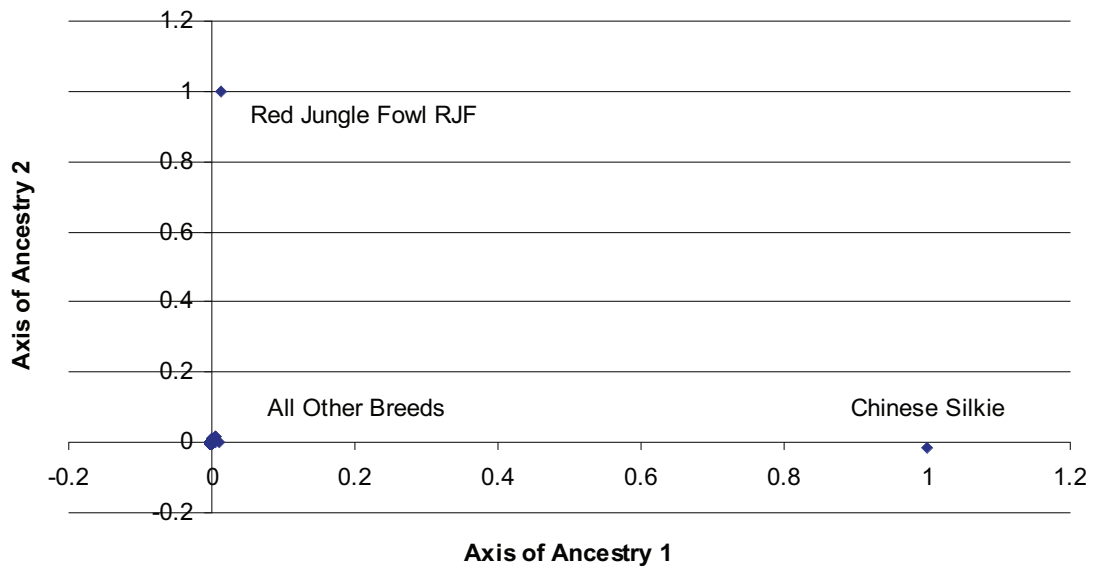

Fig. S4. Ancestry coefficients along the axis of variation.









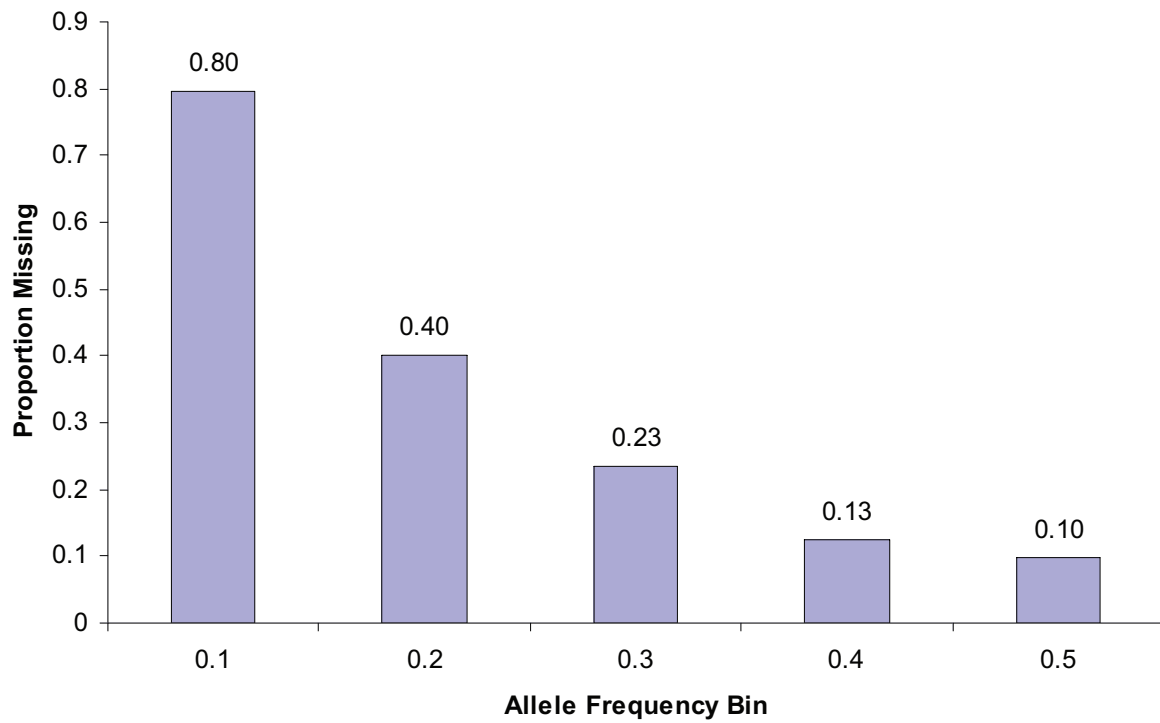

Fig. S8. Proportion of alleles missing in broiler line BR\_F02 by allele frequency bin in the HAP.

## Other Supporting Information Files

- [Table S1](#)
- [Table S2](#)
- [Table S3](#)
- [Table S4](#)
- [Table S5](#)
- [Table S6](#)
- [Table S7](#)
